# Supplementary material
Source: publisher figshare collection journal article supplement (https://frontiersin.figshare.com/ndownloader/files/25110857)
Supplement: Supplementary file [file 25110857]

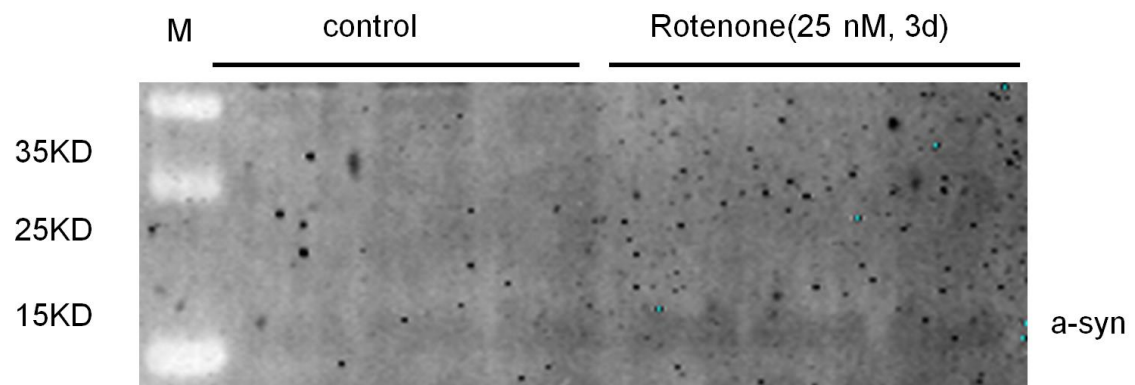

**Fig. S1** Western blot analysis of  $\alpha$ -syn expression in MES23.5 cells after 25 nM rotenone treatment for 3 days.

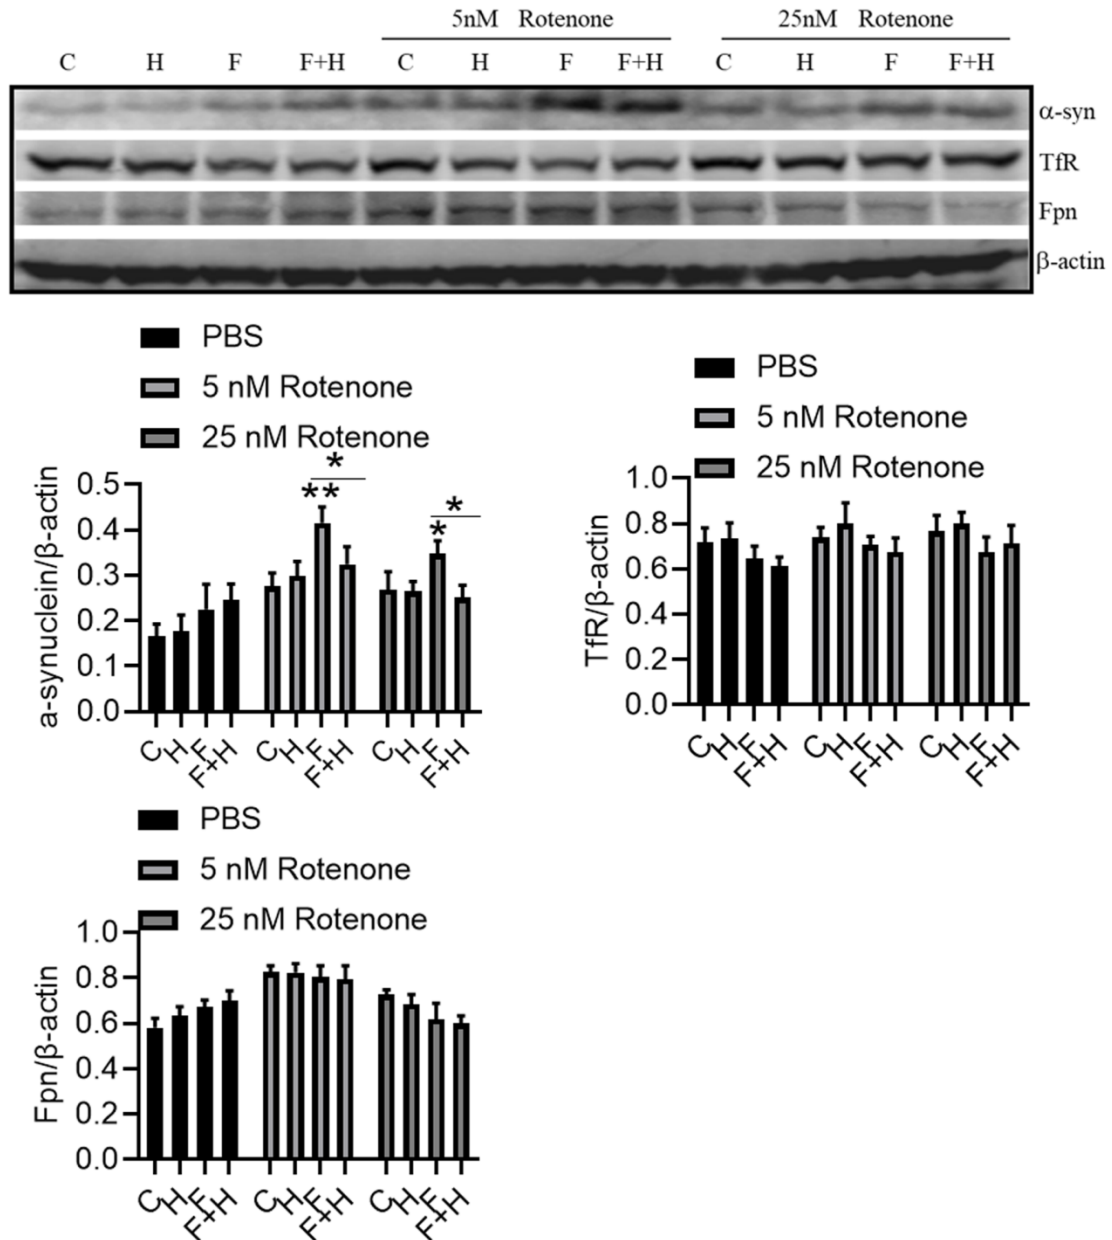

**Fig. S2**  $\alpha$ -syn expression was increased in both Ferric Ammonium Citrate (FAC) or rotenone treatment alone and treatment together. C: control; H: hepcidin; F: FAC, the concentration of FAC and hepcidin was the same with our study in the manuscript. The expression of  $\alpha$ -syn was increased significantly both treated with FAC and 5 or 25 nM rotenone when compared to control. There was no changes of  $\alpha$ -syn expression after treating with hepcidin alone both under physiological and 5 or 25 nM rotenone treatment. The expression of Fpn was not changed significantly among different groups. \*  $p < 0.05$ , \*\*  $p < 0.05$  compared to the control; \*  $p < 0.05$  compared to the indicated group.

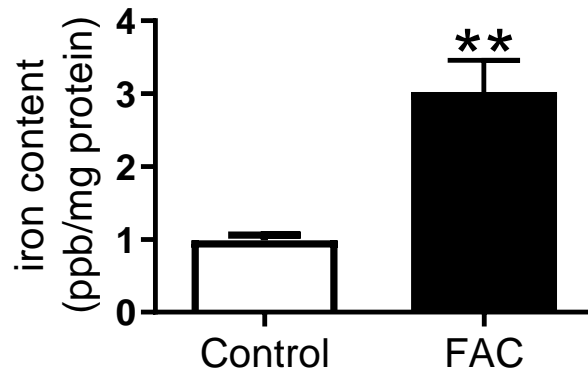

**Fig. S3** The iron content was increased significantly after treating with FAC when compared with control in SH-SY5Y cells.

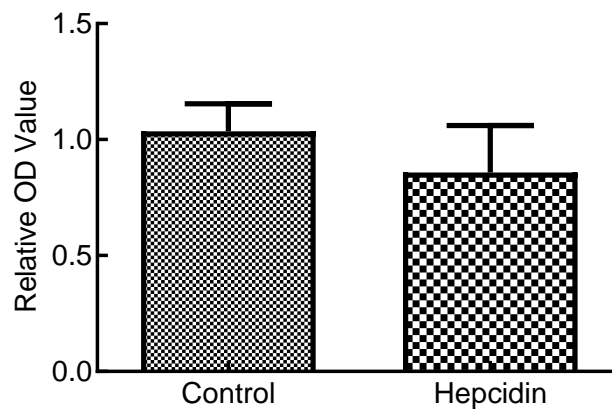

**Fig. S4** Cell viability after treating with 100 nM hepcidin for 3 days by MTT method in SH-SY5Y cells (n=4 independent experiments).
